# Supplementary material for: Thyroid Hormone Activates Brown Adipose Tissue and Increases Non-Shivering Thermogenesis - A Cohort Study in a Group of Thyroid Carcinoma Patients
Source: PubMed Central journal article supplement (PMC4718641; doi:10.1371/journal.pone.0145049), 2016-01-19
Supplement: pone.0145049.s002.pdf [file pone.0145049.s002.pdf]

| Age_hypo | Age_hyper | BMI_hypo | BMI_hyper | Weight_hypo | Weight_hyper | Bodyfatperc_hypo |
|----------|-----------|----------|-----------|-------------|--------------|------------------|
| 50.00    | 51.00     | 25.60    | 25.86     | 90.60       | 91.40        | 26.00            |
| 63.00    | 63.00     | 35.60    | 37.41     | 99.30       | 103.10       | 36.50            |
| 43.00    | 44.00     | 25.80    | 25.23     | 73.30       | 71.20        | 28.10            |
| 34.00    | 34.00     | 29.70    | 29.50     | 82.70       | 81.30        | 34.40            |
| 58.00    | 58.00     | 33.10    | 32.04     | 92.40       | 89.40        | 37.40            |
| 33.00    | 33.00     | 20.30    | 20.60     | 56.30       | 56.80        | 20.00            |
| 59.00    | 60.00     | 34.10    | 34.10     | 75.70       | 75.60        | 44.90            |
| 35.00    | 35.00     | 21.00    | 22.10     | 65.90       | 69.30        | 21.20            |
| 58.00    | 58.00     | 34.10    | 34.10     | 80.70       | 80.70        | 33.70            |
| 41.00    | 41.00     | 42.30    | 40.30     | 105.60      | 116.40       | 55.40            |

| Bodyfatperc_hyper | Fatmass_hypo | Fatmass_hyper | Delta_fatmass | Fatfreemass_hypo |
|-------------------|--------------|---------------|---------------|------------------|
| 28.00             | 23608.00     | 25422.90      | 1814.90       | 64461.20         |
| 39.90             | 36396.50     | 41394.20      | 4997.70       | 61198.40         |
| 30.30             | 20786.90     | 21972.30      | 1185.40       | 50707.30         |
| 38.20             | 28829.10     | 31925.40      | 3096.30       | 52467.80         |
| 39.30             | 34629.70     | 35498.20      | 868.50        | 557944.90        |
| 20.60             | 11365.50     | 11890.90      | 525.40        | 43132.40         |
| 44.20             | 34383.10     | 33660.10      | -723.00       | 404648.40        |
| 21.60             | 14138.40     | 15053.30      | 914.90        | 49959.00         |
| 33.80             | 27508.60     | 27377.80      | -130.80       | 51904.50         |
| 43.20             | 44995.90     | 50751.80      | 5755.90       | 58927.10         |

| Fatfreemass_hyper | Levothyroxinedose_hypo | Levothyroxinedose_hyper | Interval_Surgery_PETCT__hyc |
|-------------------|------------------------|-------------------------|-----------------------------|
| 62531.80          | 0.00                   | 100.00                  | 7.00                        |
| 60085.00          | 0.00                   | 175.00                  | 7.00                        |
| 47839.90          | 0.00                   | 150.00                  | 5.00                        |
| 49192.30          | 0.00                   | 175.00                  | 5.00                        |
| 52558.60          | 0.00                   | 137.50                  | 6.00                        |
| 43538.10          | 0.00                   | 150.00                  | 5.00                        |
| 40976.40          | 0.00                   | 125.00                  | 7.00                        |
| 52249.00          | 0.00                   | 125.00                  | 14.00                       |
| 51394.60          | 0.00                   | 137.50                  | 8.00                        |
| 64265.20          | 0.00                   | 162.50                  | 4.00                        |

| Interval_PETCThypo_PETCThypo | EETN_hypo | EETN_hyper | EECOLD_hypo | EECOLD_hyper | Hypertension_hypo |
|------------------------------|-----------|------------|-------------|--------------|-------------------|
| 21.00                        | 4.09      | 5.22       | 4.27        | 6.25         | 999.00            |
| 18.00                        | 3.12      | 4.32       | 3.31        | 5.44         | 999.00            |
| 20.00                        | 3.30      | 4.25       | 3.99        | 5.40         | 2.00              |
| 19.00                        | 4.13      | 3.89       | 4.78        | 4.78         | 1.00              |
| 21.00                        | 4.14      | 4.17       | 4.68        | 5.06         | 1.00              |
| 20.00                        | 3.64      | 3.90       | 4.96        | 5.08         | 2.00              |
| 25.00                        | 2.90      | 3.65       | 3.49        | 4.84         | 2.00              |
| 35.00                        | 4.70      | 4.45       | 5.46        | 5.17         | 1.00              |
| 15.00                        | 3.84      | 4.83       | 4.22        | 5.71         | 1.00              |
| 29.00                        | 3.75      | 5.32       | 3.93        | 6.34         | 1.00              |

| Hypertension_hyper | RRsystTN_hypo | RRsystTN_hyper | RRsystCOLD_hypo | RRsystCOLD_hypoer |
|--------------------|---------------|----------------|-----------------|-------------------|
| 2.00               | 999.00        | 136.00         | 999.00          | 140.00            |
| 2.00               | 999.00        | 127.00         | 999.00          | 145.00            |
| 2.00               | 106.00        | 115.00         | 133.00          | 106.00            |
| 2.00               | 126.00        | 107.00         | 127.00          | 108.00            |
| 1.00               | 159.00        | 145.00         | 159.00          | 146.00            |
| 2.00               | 115.00        | 104.00         | 114.00          | 113.00            |
| 2.00               | 107.00        | 113.00         | 118.00          | 126.00            |
| 1.00               | 165.00        | 148.00         | 183.00          | 176.00            |
| 1.00               | 148.00        | 142.00         | 175.00          | 142.00            |
| 2.00               | 122.00        | 118.00         | 125.00          | 120.00            |

| RRdiastTN_hypo | RRdiastTN_hyper | RRdiastCOLD_hypo | RRdiastCOLD_hyper | RRsystdelta_hypo |
|----------------|-----------------|------------------|-------------------|------------------|
| 999.00         | 86.00           | 999.00           | 92.00             | 999.00           |
| 999.00         | 75.00           | 999.00           | 75.00             | 999.00           |
| 69.00          | 68.00           | 94.00            | 61.00             | 27.00            |
| 90.00          | 70.00           | 95.00            | 75.00             | 1.00             |
| 119.00         | 102.00          | 119.00           | 105.00            | 0.00             |
| 82.00          | 68.00           | 81.00            | 75.00             | -1.00            |
| 71.00          | 67.00           | 77.00            | 74.00             | 11.00            |
| 109.00         | 107.00          | 110.00           | 104.00            | 18.00            |
| 109.00         | 97.00           | 114.00           | 101.00            | 27.00            |
| 91.00          | 77.00           | 93.00            | 83.00             | 3.00             |

| RRsystdelta_hyper | RRdiastdelta_hypo | RRdiastdelta_hyper | MAPTN_hypo | MAPTN_hyper |
|-------------------|-------------------|--------------------|------------|-------------|
| 4.00              | 999.00            | 6.00               | 999.00     | 103.00      |
| 18.00             | 999.00            | 0.00               | 999.00     | 92.00       |
| -9.00             | 25.00             | -7.00              | 81.00      | 84.00       |
| 1.00              | 5.00              | 5.00               | 102.00     | 82.00       |
| 1.00              | 0.00              | 3.00               | 132.00     | 116.00      |
| 9.00              | -1.00             | 7.00               | 93.00      | 80.00       |
| 13.00             | 0.00              | 7.00               | 83.00      | 82.00       |
| 28.00             | 1.00              | -3.00              | 128.00     | 123.00      |
| 0.00              | 5.00              | 4.00               | 122.00     | 112.00      |
| 2.00              | 2.00              | 6.00               | 101.00     | 91.00       |

| MAPCOLD_hypo | MAPCOLD_hyper | MAPDelta_hypo | MAPdelta_hyper | HR_TN_hypo | HR_Cold_hypo |
|--------------|---------------|---------------|----------------|------------|--------------|
| 999.00       | 108.00        | 999.00        | 5.00           | 999.00     | 999.00       |
| 999.00       | 98.00         | 999.00        | 6.00           | 999.00     | 999.00       |
| 107.00       | 76.00         | 26.00         | -12.00         | 60.38      | 61.93        |
| 106.00       | 86.00         | 4.00          | 4.00           | 63.24      | 61.97        |
| 132.00       | 119.00        | 0.00          | 3.00           | 36.86      | 36.96        |
| 92.00        | 88.00         | -1.00         | 8.00           | 999.00     | 999.00       |
| 91.00        | 91.00         | 8.00          | 9.00           | 37.38      | 37.43        |
| 134.00       | 128.00        | 6.00          | 5.00           | 36.97      | 54.44        |
| 134.00       | 115.00        | 12.00         | 3.00           | 72.05      | 73.18        |
| 104.00       | 95.00         | 3.00          | 4.00           | 999.00     | 999.00       |

| HR_TN_hyper | HR_Cold_hyper | HR_delta_hypo | HR_delta_hyper | TmeanskinTN_hypo |
|-------------|---------------|---------------|----------------|------------------|
| 999.00      | 999.00        | 999.00        | 999.00         | 32.15            |
| 999.00      | 999.00        | 999.00        | 999.00         | 31.60            |
| 999.00      | 999.00        | 1.55          | 999.00         | 32.26            |
| 67.94       | 67.78         | -1.27         | -0.16          | 31.91            |
| 999.00      | 999.00        | 0.10          | 999.00         | 32.39            |
| 999.00      | 999.00        | 999.00        | 999.00         | 32.73            |
| 999.00      | 999.00        | 0.05          | 999.00         | 31.98            |
| 58.65       | 54.86         | 17.46         | -3.89          | 32.19            |
| 73.63       | 75.71         | 1.13          | 2.08           | 32.50            |
| 75.00       | 69.78         | 999.00        | -8.16          | 32.61            |

| TmeanskinCOLD_hypo | TmeanskinTN_hyper | TmeanskinCOLD_hyper | TCoreTN_hypo | TCoreTN_hyper |
|--------------------|-------------------|---------------------|--------------|---------------|
| 29.86              | 33.73             | 30.29               | 37.03        | 999.00        |
| 28.88              | 33.19             | 31.55               | 36.51        | 36.33         |
| 28.53              | 33.33             | 30.41               | 36.99        | 37.18         |
| 29.51              | 32.51             | 30.25               | 37.71        | 36.99         |
| 30.19              | 33.29             | 30.26               | 36.88        | 36.93         |
| 29.90              | 33.78             | 30.52               | 999.00       | 37.08         |
| 29.06              | 32.60             | 30.48               | 37.44        | 36.70         |
| 29.85              | 33.42             | 31.01               | 36.98        | 37.08         |
| 30.35              | 33.33             | 31.79               | 37.79        | 37.40         |
| 29.23              | 33.38             | 32.17               | 36.90        | 40.53         |

| TCoreCOLD_hypo | TCoreCOLD_hyper | TCoreTN_delta | TCoreCOLD_delta | TCoreminskinTN_hypo |
|----------------|-----------------|---------------|-----------------|---------------------|
| 37.52          | 999.00          | 0.50          | 999.00          | 5.07                |
| 36.56          | 36.11           | 0.06          | -0.22           | 4.82                |
| 999.00         | 37.63           | 999.00        | 0.45            | 999.00              |
| 37.96          | 37.96           | 0.25          | 0.97            | 5.80                |
| 37.16          | 37.13           | 0.29          | 0.21            | 4.48                |
| 999.00         | 37.08           | 999.00        | 0.00            | 999.00              |
| 37.41          | 36.79           | -0.03         | 0.08            | 2.99                |
| 37.30          | 37.66           | 0.32          | 0.57            | 4.78                |
| 39.01          | 37.71           | 1.23          | 0.31            | 5.27                |
| 36.82          | 41.04           | -0.16         | 0.51            | 4.30                |

| TCoreminskinTN_hyper | TCoreminskinCOLD_hypo | TCoreminskinCOLD_hyper | Tcoreminskindelta_hypo |
|----------------------|-----------------------|------------------------|------------------------|
| 999.00               | 7.66                  | 999.00                 | 2.59                   |
| 3.14                 | 7.68                  | 999.00                 | 2.86                   |
| 2.95                 | 999.00                | 999.00                 | 999.00                 |
| 4.49                 | 8.42                  | 7.00                   | 2.62                   |
| 3.61                 | 6.76                  | 6.91                   | 2.29                   |
| 3.29                 | 999.00                | 6.55                   | 999.00                 |
| 5.25                 | 8.37                  | 6.35                   | 1.75                   |
| 3.56                 | 7.33                  | 6.48                   | 2.55                   |
| 5.24                 | 8.67                  | 5.85                   | -3.26                  |
| 6.86                 | 7.59                  | 9.80                   | 2.64                   |

| Tcoreminskindelta_hyper | RelativeSPhandTN_hypo | RelativeSPfhandTN_hyper | RelativeSPhandCOLD_hypo |
|-------------------------|-----------------------|-------------------------|-------------------------|
| 999.00                  | 1.00                  | 1.00                    | 0.33                    |
| 999.00                  | 1.00                  | 1.00                    | 0.53                    |
| 999.00                  | 1.00                  | 1.00                    | 0.44                    |
| 2.50                    | 1.00                  | 1.00                    | 0.20                    |
| 3.30                    | 1.00                  | 1.00                    | 0.57                    |
| 3.24                    | 1.00                  | 1.00                    | 0.19                    |
| 6.00                    | 1.00                  | 1.00                    | 0.04                    |
| 2.93                    | 1.00                  | 1.00                    | 0.43                    |
| 2.99                    | 1.00                  | 1.00                    | 0.48                    |
| 2.96                    | 1.00                  | 1.00                    | 0.90                    |

| RelativeSPhandCOLD_hyper | RelativeSPhanddelta_hypo | RelativeSPhanddelta_hyper |
|--------------------------|--------------------------|---------------------------|
| 0.08                     | -0.67                    | -0.92                     |
| 0.26                     | -0.47                    | -0.74                     |
| 0.11                     | -0.56                    | -0.89                     |
| 0.19                     | -0.80                    | -0.81                     |
| 0.30                     | -0.43                    | -0.70                     |
| 1.98                     | -0.81                    | 0.98                      |
| 999.00                   | -0.96                    | 999.00                    |
| 1.39                     | -0.57                    | 0.39                      |
| 0.60                     | -0.52                    | -0.40                     |
| 0.70                     | -0.10                    | -0.30                     |

| BAT_SUVmean_hypo | BAT_SUVmean_hyper | BAT_SUVmeandelta | FFA_hypo | FFA_hyper | FFAdelta |
|------------------|-------------------|------------------|----------|-----------|----------|
| 1.01             | 1.77              | 0.76             | 681.43   | 598.81    | 82.62    |
| 1.58             | 1.81              | 0.23             | 510.05   | 476.77    | 33.28    |
| 2.60             | 3.69              | 1.09             | 633.86   | 596.43    | 37.43    |
| 6.99             | 8.41              | 1.42             | 534.78   | 527.12    | 7.66     |
| 1.31             | 1.43              | 0.12             | 605.66   | 907.25    | -301.59  |
| 3.38             | 8.24              | 4.86             | 821.66   | 524.04    | 297.62   |
| 2.58             | 2.66              | 0.08             | 932.97   | 372.28    | 560.69   |
| 1.56             | 1.77              | 0.21             | 915.95   | 282.98    | 632.97   |
| 1.20             | 2.50              | 1.30             | 952.36   | 659.79    | 292.57   |
| 1.30             | 7.47              | 6.17             | 750.16   | 673.00    | 77.16    |

| TG_hypo | TG_hyper | TGdelta | CRP_hypo | CRP_hyper | Glucose_hypo | Glucose_hyper | Insulin_hypo |
|---------|----------|---------|----------|-----------|--------------|---------------|--------------|
| 2096.98 | 1251.80  | 845.18  | 0.43     | 1.25      | 4.69         | 5.23          | 7.18         |
| 1356.46 | 716.92   | 639.80  | 0.10     | 0.60      | 5.57         | 5.62          | 9.21         |
| 1632.85 | 761.05   | 871.80  | 0.12     | 0.40      | 4.30         | 5.28          | 3.47         |
| 1365.46 | 73.00    | 1292.46 | 0.12     | 0.60      | 4.69         | 5.08          | 9.31         |
| 1087.78 | 904.72   | 183.06  | 0.50     | 3.28      | 5.11         | 5.35          | 6.55         |
| 1426.10 | 452.82   | 973.28  | 0.30     | 0.91      | 4.43         | 5.18          | 5.74         |
| 1554.28 | 1563.60  | -9.32   | 2.70     | 4.62      | 5.72         | 5.49          | 8.38         |
| 1905.70 | 1622.19  | 283.51  | 14.03    | 16.00     | 5.94         | 5.67          | 6.91         |
| 1437.20 | 1097.91  | 339.29  | 3.16     | 5.66      | 4.20         | 4.64          | 11.83        |
| 1675.64 | 1224.90  | 450.74  | 7.28     | 15.01     | 5.37         | 5.95          | 10.72        |

| Insulin_hyper | NoradrenalinTN_hypo | NoradrenalinCOLD_hypo | Noradrenalindelta_hypo |
|---------------|---------------------|-----------------------|------------------------|
| 10.57         | 14.00               | 4.90                  | -9.40                  |
| 9.18          | 5.07                | 9.32                  | 4.25                   |
| 5.68          | 6.24                | 11.40                 | 5.16                   |
| 4.42          | 999.00              | 7.66                  | 999.00                 |
| 7.44          | 3.67                | 8.38                  | 4.71                   |
| 5.18          | 1.85                | 4.17                  | 2.32                   |
| 9.57          | 4.42                | 5.53                  | 1.11                   |
| 6.55          | 2.23                | 5.36                  | 3.13                   |
| 20.56         | 3.20                | 3.33                  | 0.13                   |
| 15.16         | 1.40                | 2.31                  | 0.91                   |

| NoradrenalinTN_hyper | NoradrenalinCOLD_hyper | Noradrenalindelta_hyper | AdrenalinTN_hypo |
|----------------------|------------------------|-------------------------|------------------|
| 2.48                 | 4.26                   | 1.78                    | 0.10             |
| 3.58                 | 5.06                   | 1.48                    | 0.32             |
| 4.67                 | 7.15                   | 2.48                    | 0.14             |
| 1.43                 | 2.34                   | 0.91                    | 999.00           |
| 1.37                 | 3.77                   | 2.40                    | 0.16             |
| 1.00                 | 2.19                   | 1.19                    | 0.34             |
| 2.00                 | 1.85                   | -0.15                   | 0.19             |
| 2.05                 | 3.63                   | 1.58                    | 0.30             |
| 1.78                 | 999.00                 | 999.00                  | 0.20             |
| 1.03                 | 2.11                   | 1.08                    | 0.15             |

| AdrenalinCOLD_hypo | Adrenalindelta_hypo | AdrenalinTN_hyper | AdrenalinCOLD_hyper |
|--------------------|---------------------|-------------------|---------------------|
| 0.49               | 0.39                | 0.33              | 0.19                |
| 0.17               | -0.15               | 0.01              | 0.07                |
| 0.11               | -0.03               | 0.10              | 0.06                |
| 0.28               | 999.00              | 0.08              | 0.08                |
| 0.12               | -0.04               | 0.10              | 0.06                |
| 0.25               | -0.09               | 0.14              | 0.14                |
| 0.09               | -0.10               | 0.07              | 0.05                |
| 0.24               | -0.06               | 0.14              | 0.17                |
| 0.18               | -0.02               | 0.15              | 999.00              |
| 0.09               | -0.06               | 0.08              | 0.06                |

| Adrenalindelta_hyper | TSH_hypo | TSH_hyper | TSHdelta | ft4_hypo | ft4_hyper | ft4delta |
|----------------------|----------|-----------|----------|----------|-----------|----------|
| -0.14                | 124.20   | 0.00      | 124.20   | 3.00     | 25.00     | 22.00    |
| 0.06                 | 999.00   | 999.00    | 999.00   | 25.00    | 25.80     | 0.80     |
| -0.04                | 117.40   | 1.70      | 115.70   | 2.50     | 23.00     | 20.50    |
| 0.00                 | 190.00   | 0.10      | 189.90   | 3.00     | 26.50     | 23.50    |
| -0.04                | 52.60    | 0.00      | 52.60    | 3.40     | 27.20     | 23.80    |
| 0.00                 | 107.00   | 0.00      | 107.00   | 3.70     | 24.80     | 21.10    |
| -0.02                | 160.60   | 0.80      | 159.80   | 3.30     | 21.60     | 18.30    |
| 0.03                 | 13.40    | 0.10      | 13.30    | 5.30     | 23.20     | 17.90    |
| 999.00               | 140.60   | 1.00      | 139.60   | 3.40     | 19.50     | 16.10    |
| -0.02                | 62.60    | 0.80      | 61.80    | 3.50     | 14.20     | 10.70    |
